# Supplementary material
Source: publisher site journal article supplement (https://www.dovepress.com/article/135657)
Supplement: Supplementary file 1 [file get_supplementary_file.php]

## SUPPLEMENTARY MATERIAL

Search strategy: (chronic obstructive pulmonary disease OR chronic obstructive airways disease OR COPD OR emphysema OR bronchitis OR airways obstruction OR obstructive lung disease) AND (mortality OR prognosis OR survival rate OR survival analysis OR survival prediction OR survival OR prognostic factor OR death) AND (palliative care). Common prognostic factors for COPD were searched for using terms such as “performance status” or “weight loss.” The search was augmented by scanning references of identified articles and reviews. Potentially relevant studies were retrieved and evaluated if they reported a disease presentation with a median survival of  $\leq 1$  year.

## Methods

Measurement of variables in cohort study.

The present study is a pooled-analysis of individual patient-data from four Spanish patient cohorts, hospitalized for acute exacerbation of COPD. All cohorts were previously published. (1-4) Out of a total of 1.001 patients initially evaluated, 267 (27%) were excluded for lack of data of the most important variables analysed and 67 (6.7%) for incomplete 1-year follow-up. Figure E1. Excluded patients were similar to studied population, without statistical differences in age, gender, dyspnoea scale or number of hospitalizations for COPD exacerbations in the previous year, but with differences in FEV1 (%) (42.8% vs.46%;  $p=0.01$ ) and Charlson index (2.6 vs. 2.9;  $p=0.04$ )

Blood gas, serum albumin, chronic use of home oxygen therapy, smoking history and body mass index were determined during hospitalization. Cor pulmonale diagnosis was based on clinical criteria. Quality of life was assessed using the

validated Spanish version of the Saint George's Respiratory Questionnaire (SGRQ), while for the assessment of dyspnoea a modified version of the Medical Research Council version was used. Comorbidity was assessed with the Charlson index, unadjusted for age and including COPD as comorbidity. Functional status was assessed using the Katz index in stable phase. Finally, the presence of depression was calculated with the 15-point Yesavage scale. (6-10) Previous severe exacerbations were defined as those requiring hospitalization during the previous year. Post-bronchodilator forced spirometry was performed in stable phase one month after discharge according to the guidelines of the American Thoracic Society/European Respiratory Society consensus. (11)

All participants gave their informed written consent to participate, and the Ethics Committee of University Hospital Mutua de Terrassa approved all previous studies.

Table E-1

Variables and thresholds to estimate BODE, BODEX and CODEX index.

| INDEX | VARIABLES                | SCORING |         |         |       |
|-------|--------------------------|---------|---------|---------|-------|
|       |                          | 0       | 1       | 2       | 3     |
| BODE  |                          |         |         |         |       |
|       | BMI (Kg/m <sup>2</sup> ) | >21     | ≤21     |         |       |
|       | FEV1 (%)                 | ≥65     | 50-64   | 36-49   | ≤35   |
|       | Dyspnoea (mMRC)          | 0-1     | 2       | 3       | 4     |
|       | 6' walking test (m)      | ≥350    | 250-349 | 150-249 | ≤ 149 |
| BODEX |                          |         |         |         |       |
|       | BMI (Kg/m <sup>2</sup> ) | >21     | ≤21     |         |       |
|       | FEV1 (%)                 | ≥65     | 50-64   | 36-49   | ≤35   |
|       | Dyspnoea (mMRC)          | 0-1     | 2       | 3       | 4     |
|       | Severe exacerbations     | 0       | 1-2     | ≥3      |       |
| CODEX |                          |         |         |         |       |
|       | Charlson index           | 0-4     | 5-7     | ≥8      |       |
|       | FEV1 (%)                 | ≥65     | 50-64   | 36-49   | ≤35   |
|       | Dyspnoea (mMRC)          | 0-1     | 2       | 3       | 4     |
|       | Severe exacerbations     | 0       | 1-2     | ≥3      |       |

Table E-2. Supplementary material.

| COPD GUIDELINES                                                    | Year | PC  | Criterion |
|--------------------------------------------------------------------|------|-----|-----------|
| Australian and New Zealand Guidelines for the management of COPD   | 2015 | Yes | Yes (12)  |
| Guía Española de la EPOC (GesEPOC)                                 | 2012 | Yes | Yes (13)  |
| Asociación Argentina De Medicina Respiratoria                      | 2012 | Yes | Yes (14)  |
| Lincolnshire Respiratory Network (Great Britain)                   | 2011 | Yes | Yes (15)  |
| ATS End-of-life Care Task Force                                    | 2008 | Yes | Yes (16)  |
| Canadian Thoracic Society                                          | 2008 | Yes | Yes (17)  |
| Global Obstructive Lung Disease (GOLD)                             | 2016 | Yes | No (18)   |
| National Institute for Health and Care Excellence (NICE)           | 2016 | Yes | No (19)   |
| ATS/ERS Task Force for COPD Research                               | 2015 | Yes | No (20)   |
| Interdisciplinary Association for Research in Lung Disease (Italy) | 2014 | Yes | No (21)   |
| The Czech Pneumological and Physiological Society                  | 2013 | Yes | No (22)   |
| Polish Society of Lung Diseases                                    | 2012 | Yes | No (23)   |
| Royal Society of Medicine (Great Britain)                          | 2007 | Yes | No (24)   |
| Clinical Practice Guidelines (Malaysia)                            | 2016 | No  | No (25)   |
| Finnish guidelines                                                 | 2015 | No  | No (26)   |
| Asociación Latino Americana del Tórax                              | 2015 | No  | No (27)   |
| National College of Chest Physicians (India)                       | 2014 | No  | No (28)   |
| Saudi Guidelines for the Diagnosis and Management of COPD          | 2014 | No  | No (29)   |
| French Pulmonary Medicine Society                                  | 2014 | No  | No (30)   |
| Swiss Respiratory Society                                          | 2013 | No  | No (31)   |
| Diagnosis and Treatment of COPD (Portugal)                         | 2013 | No  | No (32)   |
| American College of Physicians (USA)                               | 2011 | No  | No (33)   |
| COPD Working Group/South Africa                                    | 2011 | No  | No (34)   |
| Guidelines for the diagnosis and therapy of COPD (Germany)         | 2007 | No  | No (35)   |
| International Primary Care Respiratory Group                       | 2006 | No  | No (36)   |
| Russian Respiratory Guidelines                                     | 2015 | No  | No (37)   |
| GLOBO - Ghid local de management al BPOC (Romania)                 | 2010 | No  | No (38)   |
| Guidelines for the diagnosis and treatment of COPD. Japan          | 2010 | No  | No (39)   |
| NECPAL CCOMS-ICO. Instituto Catalán de Oncología                   | 2011 | Yes | Yes (40)  |
| The National Hospice and Palliative Care Organization (USA)        | 2016 | Yes | Yes (41)  |

COPD Guidelines and year of publication. PC =The guidelines have a chapter on palliative care. Criteria = The guidelines suggest poor prognosis criteria for considering starting PC.

Table E-3. Supplementary material

| Variables                 | N | References         |
|---------------------------|---|--------------------|
| Age ≥ 70 years            | 3 | 42S- 44S           |
| Non-married               | 1 | 45S                |
| Physical dependence       | 1 | 42S                |
| Poor quality of life      | 6 | 44S, 46S-50S       |
| BMI ≤21 Kg/m <sup>2</sup> | 4 | 42S, 51S- 53S      |
| Serum albumin <25 mg/dl   | 0 | No data            |
| Comorbidities             | 2 | 53S, 54S           |
| Depression                | 4 | 55S, 56S, 57S, 58S |
| Anaemia                   | 1 | 59S                |
| Cor pulmonale/PH          | 3 | 60S-62S            |
| Previous hospitalization  | 9 | 58S, 63S-70S       |
| FEV1 ≤30%                 | 9 | 49S-51S,70-76S     |
| Dyspnoea (mMRC)           | 2 | 71S, 73S           |
| Hypoxemia                 | 4 | 44S,51S,77S,78S    |
| Hypercapnia               | 3 | 79S-81S            |
| Invasive ventilation      | 4 | 82S-85S            |
| NIV                       | 4 | 64S, 82S, 86S, 87S |
| BODE                      | 5 | 50S,72S, 88S-90S   |

Published articles with percentage of 1-year mortality. N= number of studies retrieved. References of original articles, (S) are displayed in Supplementary Material.

PH=Pulmonary Hypertension

BMI=Body mass index. mMRC= modified Dyspnoea Medical Research Council scale. NIV=Non-invasive ventilation.

Figure E1.

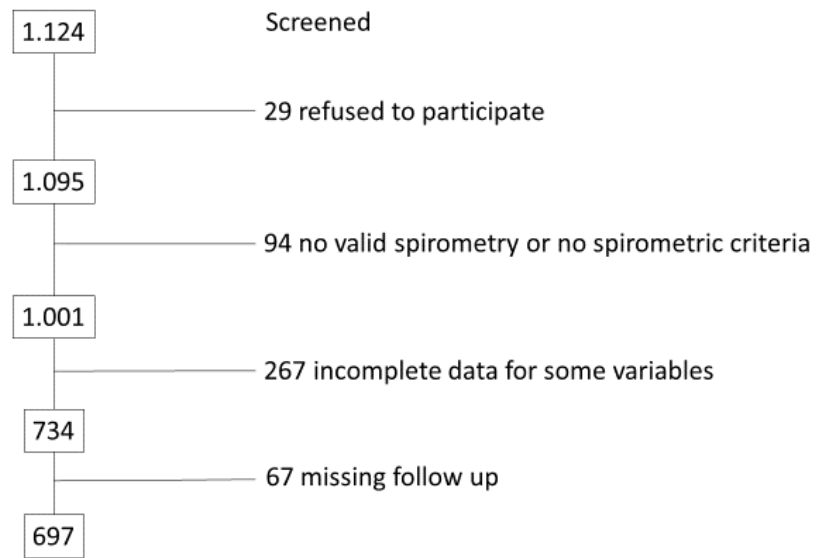

Strengthening the Reporting of Observational Studies in Epidemiology (STROBE)

## References supplementary material

- 1.-Almagro P, Calbo E, Ochoa de Echagüen A, et al. 2002. Mortality after hospitalization for COPD. *Chest*,121:1441-8.
- 2.-Sanjaume M, Almagro P, Rodríguez-Carballeira M, et al. 2009. Post-hospital mortality in patients re-admitted due to COPD. Utility of BODE index. *Rev Clin Esp*, 209:364-70.
- 3.-Almagro P, Salvadó M, Garcia-Vidal C, et al. 2010. Recent improvement in long-term survival after a COPD hospitalisation. *Thorax*, 65:298-302.
- 4.-Almagro P, Salvadó M, Garcia-Vidal C, et al. Pseudomonas aeruginosa and mortality after hospital admission for chronic obstructive pulmonary disease. *Respiration*. 2012;84(1):36-43.
- 5.-Almagro P, Cabrera FJ, Diez J, et al. Comorbidities and short-term prognosis in patients hospitalized for acute exacerbation of COPD: the EPOC en Servicios de medicina interna (ESMI) study. *Chest*. 2012;142(5):1126-33.
- 6.-Ferrer M, Alonso J, Prieto L, et al. Validity and reliability of the St. George's Respiratory Questionnaire after adaptation to a different language and culture: the Spanish example. *Eur Respir J*. 1996; 9:1160-1166.
- 7.-Bestall JC, Paul EA, Garrod R, Garnham R, Jones PW, Wedzicha JA. Usefulness of the Medical Research Council (MRC) dyspnoea scale as a measure of disability in patients with chronic obstructive pulmonary disease. *Thorax*. 1999;54:581-6)
- 8.-Charlson ME, Pompei P, Ales K, MacKenzie CR. A new method of classifying prognostic comorbidity in longitudinal studies: Development and validation. *J Chron Dis*. 1987;40:373-83
- 9.-Katz S, Ford AB, Moskowitz RW, et al. Studies of illness in the aged: the index of ADL; a standardized measure of biological and psychosocial function. *JAMA*. 1963; 185:914-9
- 10.-Seikh JI, Yesavage JA. Geriatric depression scale (GDS): recent evidence and development of a shorter version. *Clin Gerontol*. 1986; 6:165-173.
- 11.- Miller MR, Hankinson J, Brusasco V, et al. ATS/ERS Task Force. Standardisation of spirometry. *Eur Respir J*. 2005 ;26(2):319-38.
- 12.- The COPD-X Plan Australian and New Zealand Guidelines for the management of Chronic Obstructive Pulmonary Disease 2015. Available in <http://copdx.org.au/copd-x-plan>. Consulted in July 14, 2016.
- 13.- Grupo de Trabajo de Guía Española de la EPOC (GesEPOC). Guía Española de la EPOC (GesEPOC). *Arch Bronconeumol*. 2012;48(Supl 1):2-58.
- 14.- Figueroa Casas JC, Schiavi E, et al. Guidelines for COPD prevention, diagnosis and treatment in Argentina. *Medicina (B Aires)*. 2012;72 Suppl 1:1-33.

15.- Trueman J, Trueman I. Developing criteria to assist in the palliative phase of COPD. *Br J Nurs*. 2011 ;20(6):364-9.

16.- Lanken PN, Terry PB, Delisser HM, et al. ATS End-of-Life Care Task Force. An official American Thoracic Society clinical policy statement: palliative care for patients with respiratory diseases and critical illnesses. *Am J Respir Crit Care Med*. 2008;177(8):912-27.

17.- O'Donnell, P Hernandez, A Kaplan, et al. Canadian Thoracic Society recommendations for management of chronic obstructive pulmonary disease – 2008 update – highlights for primary care. *Can Respir J*. 2008;15(Suppl A):1A-8A.

18.- Global Obstructive Lung Disease. Available in:  
[http://www.goldcopd.org/uploads/users/files/GOLD\\_Report%202016.pdf](http://www.goldcopd.org/uploads/users/files/GOLD_Report%202016.pdf).  
Consulted in July 14, 2016.

19.- National Institute for Health and Care Excellence. Chronic Obstructive Pulmonary Disease: Management of Chronic Obstructive Pulmonary Disease in Adults in Primary and Secondary Care (Partial Update). Available in:  
[www.nice.org.uk/guidance/cg101](http://www.nice.org.uk/guidance/cg101). Consulted in July 14, 2016.

20.- Celli BR, Decramer M, Wedzicha JA, et al. ATS/ERS Task Force for COPD Research. An official American Thoracic Society/European Respiratory Society statement: research questions in COPD. *Eur Respir J*. 2015 ;45(4):879-905.

21.- Bettoncelli G, Blasi F, Brusasco V, et al. The clinical and integrated management of COPD. An official document of AIMAR (Interdisciplinary Association for Research in Lung Disease), AIPO (Italian Association of Hospital Pulmonologists), SIMER (Italian Society of Respiratory Medicine), SIMG (Italian Society of General Medicine). *Multidiscip Respir Med*. 2014;9(1):25.

22.- Koblizek V, Chlumsky J, Zindr V, et al. Chronic Obstructive Pulmonary Disease: official diagnosis and treatment guidelines of the Czech Pneumological and Phthysiological Society; a novel phenotypic approach to COPD with patient-oriented care. *Biomed Pap Med Fac Univ Palacky Olomouc Czech Repub*. 2013 ;157(2):189-201.

23.- Górecka D, Jassem E, Pierzchała W, Sliwiński P; Polskie Towarzystwo Chorób Płuc (PTChP). [Recommendations of the Polish Society of Lung Diseases for diagnosis and treatment of chronic obstructive pulmonary disease (COPD)]. *Pneumonol Alergol Pol*. 2012;80(3):220-54.

24.- Seamark DA, Seamark CJ, Halpin DM. Palliative care in chronic obstructive pulmonary disease: a review for clinicians. *J R Soc Med*. 2007 ;100(5):225-33.

25.- Clinical Practice Guidelines. Management of Chronic Obstructive Pulmonary Disease. Available in:  
<http://www.moh.gov.my/attachments/4749.pdf>. Consulted in July 14, 2016.



- 26.- Kankaanranta H, Harju T, Kilpeläinen M, et al. Diagnosis and pharmacotherapy of stable chronic obstructive pulmonary disease: the Finnish guidelines. *Basic Clin Pharmacol Toxicol*. 2015 ;116(4):291-307.
- 27.- Montes de Oca M, López Varela MV, Acuña A, et al. ALAT-2014 Chronic Obstructive Pulmonary Disease (COPD) Clinical Practice Guidelines: questions and answers. *Arch Bronconeumol*. 2015 ;51(8):403-16.
- 28.- Gupta D, Agarwal R, Aggarwal AN, et al. *Indian J Chest Dis Allied Sci*. 2014;56 Spec No:5-54.
- 29.- Khan JH, Lababidi HM, Al-Moamary MS, et al. The Saudi Guidelines for the Diagnosis and Management of COPD. *Ann Thorac Med*. 2014 ;9(2):55-76.
- 30.- Perez T, Garcia G, Roche N, et al. French Pulmonary Medicine Society. Guidelines for clinical practice. Management of COPD. Update 2012: Pulmonary function tests. *Rev Mal Respir*. 2014 ;31(3):263-94.
- 31.- Russi EW, Karrer W, Brutsche M, et al. Swiss Respiratory Society. Diagnosis and management of chronic obstructive pulmonary disease: the Swiss guidelines. Official guidelines of the Swiss Respiratory Society. *Respiration*. 2013;85(2):160-74.
- 32.- Health Ministry, Portugal. Diagnóstico e Tratamento da Doença Pulmonar Obstrutiva Crónica. [Diagnosis and Treatment of Chronic Obstructive Pulmonary Disease.] Standard No. 028/2011. Available in: [www.dgs.pt/directrizes-da-dgs/normas-e-circulares-normativas/norma-n-0282011-de-30092011-atualizada-a-10092013.aspx](http://www.dgs.pt/directrizes-da-dgs/normas-e-circulares-normativas/norma-n-0282011-de-30092011-atualizada-a-10092013.aspx). Consulted in July 14, 2016.
- 33.- Qaseem A, Wilt TJ, Weinberger SE, et al. Diagnosis and management of stable chronic obstructive pulmonary disease: a clinical practice guideline update from the American College of Physicians, American College of Chest Physicians, American Thoracic Society, and European Respiratory Society. *Ann Intern Med*. 2011 Aug 2;155(3):179-91.
- 34.- Abdool-Gaffar MS, Ambaram A, Ainslie GM, et al. COPD Working Group. Guideline for the management of chronic obstructive pulmonary disease-2011 update. *S Afr Med J*. 2011 Jan;101(1 Pt 2):63-73.
- 35.- Vogelmeier C, Buhl R, Criée CP, et al. Guidelines for the diagnosis and therapy of COPD issued by Deutsche Atemwegsliga and Deutsche Gesellschaft für Pneumologie und Beatmungsmedizin. *Pneumologie*. 2007;61(5):e1-40.
- 36.- Bellamy D, Bouchard J, Henrichsen S, et al. International Primary Care Respiratory Group (IPCRG) Guidelines: management of chronic obstructive pulmonary disease (COPD). *Prim Care Respir J*. 2006 ;15(1):48-57.
- 37.- A.G.Chuchalin, S.N.Avdeev, Z.R.Aysanov, et al. Russian Respiratory Society. Federal guidelines on diagnosis and treatment of chronic obstructive pulmonary disease. Available in: <http://www.pulmonology.ru> Consulted in 14, July 2016.

- 38.- GLOBO - Ghid local de management al BPOC. Available in: <http://www.srp.ro/ghiduri/Ghid-GLOBO-BPOC%202010.pdf>. Consulted in 14, July 2016.
- 39.- Guidelines for the diagnosis and treatment of COPD. Available in: <http://www.jrs.or.jp/uploads/uploads/files/photos/765.pdf>.
- 40.-Gomez-Batiste X, Martinez.Muñoz M, Blay C, et al.Proyecto NECPAL CCOMS-ICO. Identificación y atención integral-integrada de personas con enfermedades crónicas avanzadas en servicios de salud y sociales. Institut Català d'Oncologia. Available in <http://www.icononcologia.net>. Consulted in 14, July 2016.
- 41.-The National Hospice and Palliative Care Organization. Available in <http://www.nhpco.org>. Consulted in 14, July 2016.
- 42.-Connors AF Jr, Dawson NV, Thomas C, et al.Outcomes following acute exacerbation of severe chronic obstructive lung disease. The SUPPORT investigators (Study to Understand Prognoses and Preferences for Outcomes and Risks of Treatments). *Am J Respir Crit Care Med*. 1996 Oct;154(4 Pt 1):959-67
- 43.-Burgel PR, Paillasseur JL, Peene B, et al.Two distinct chronic obstructive pulmonary disease (COPD) phenotypes are associated with high risk of mortality. *PLoS One*. 2012;7(12):e51048.
- 44.-Carone M, Antoniu S, Baiardi P,et al. 2016. Predictors of mortality in patients with COPD and chronic respiratory failure:The Quality-of-Life Evaluation and Survival Study (QuESS): A Three-Year Study. *COPD*,13:130-8.
- 45.-Bowen JB, Votto JJ, Thrall RS, et al. Functional status and survival following pulmonary rehabilitation. *Chest* 2000; 118:697–703.
- 46.- Gudmundsson G, Gislason T, Lindberg E, et al. Mortality in COPD patients discharged from hospital: the role of treatment and co-morbidity. *Respir Res*. 2006;7:109.
- 47.-Budweiser S, Hitzl AP, Jörres RA, Schmidbauer K, Heinemann F, Pfeifer M. Health-related quality of life and long-term prognosis in chronic hypercapnic respiratory failure: a prospective survival analysis. *Respir Res*. 2007 ;8:92.
- 48.- Yorgancioglu A, Havlucu Y, Celik P, Dinc G, Saka A .Relation between quality of life and morbidity and mortality in COPD patients: Two-year follow-up study. *COPD*. 2010 ;7(4):248-53.
- 49.- Domingo-Salvany A, Lamarca R, Ferrer M, et al. Health-related quality of life and mortality in male patients with chronic obstructive pulmonary disease. *Am J Respir Crit Care Med*. 2002;166(5):680-5.
- 50.-Marin JM, Cote CG, Diaz O, et al. Prognostic assessment in COPD: health related quality of life and the BODE index. *Respir Med*. 2011 ;105(6):916-21.

- 51.-Gray-Donald K, Gibbons L, Shapiro SH, Macklem PT, Martin JG. Nutritional status and mortality in chronic obstructive pulmonary disease. *Am J Respir Crit Care Med.* 1996;153(3):961-6.
- 52.-Lainscak M, von Haehling S, Doehner W, et al. Body mass index and prognosis in patients hospitalized with acute exacerbation of chronic obstructive pulmonary disease. *J Cachexia Sarcopenia Muscle.* 2011 ;2(2):81-86.
- 53.- Marti S, Muñoz X, Rios J, Morell F, Ferrer J. Body weight and comorbidity predict mortality in COPD patients treated with oxygen therapy. *Eur Respir J.* 2006;27(4):689-96.
- 54.-Maters GA, de Voogd JN, Sanderman R, Wempe JB. Predictors of all-cause mortality in patients with stable COPD: medical co-morbid conditions or high depressive symptoms. *COPD.* 2014;11(4):468-74.
- 55.-Yohannes AM, Raue PJ, Kanellopoulos D, et al. Predictors of All-Cause Mortality in Patients with Severe COPD and Major Depression Admitted to a Rehabilitation Hospital. *Chest.* 2016. 149:467-73
- 56.-de Voogd JN, Wempe JB, Koëter GH, et al. Depressive symptoms as predictors of mortality in patients with COPD. *Chest.* 2009;135(3):619-25.
- 57.-Papaioannou AI, Bartziokas K, Tsirikas S et al. The impact of depressive symptoms on recovery and outcome of hospitalised COPD exacerbations. *Eur Respir J.* 2013 Apr;41(4):815-23.
- 58.- Ng TP, Niti M, Tan WC, Cao Z, Ong KC, Eng P. Depressive symptoms and chronic obstructive pulmonary disease: effect on mortality, hospital readmission, symptom burden, functional status, and quality of life. *Arch Intern Med.* 2007 ;167(1):60-7.
- 59.-Martinez-Rivera C, Portillo K, Muñoz-Ferrer A, et al. Anemia is a mortality predictor in hospitalized patients for COPD exacerbation. *COPD.* 2012 ;9(3):243-50.
- 60.- Chaouat A, Bugnet AS, Kadaoui N, et al. Severe pulmonary hypertension and chronic obstructive pulmonary disease. *Am J Respir Crit Care Med.* 2005;172(2):189-94.
- 61.-Oswald-Mammosser M, Weitzenblum E, Quoix E, et al. Prognostic factors in COPD patients receiving long-term oxygen therapy. Importance of pulmonary artery pressure. *Chest.* 1995;107(5):1193–1198.
- 62.-Hurdman J, Condliffe R, Elliot CA, et al. Pulmonary hypertension in COPD: results from the ASPIRE registry. *Eur Respir J.* 2013;41(6):1292-301.
- 63.-Soler-Cataluña JJ, Martínez-García MA, Román Sánchez P, Salcedo E, Navarro M, Ochando R. Severe acute exacerbations and mortality in patients with chronic obstructive pulmonary disease. *Thorax.* 2005 ;60(11):925-31.

- 64.-Steer J, Gibson GJ, Bourke SC. Longitudinal change in quality of life following hospitalisation for acute exacerbations of COPD. *BMJ Open Respir Res.* 2015;2(1):e000069
- 65.-Balcells E, Gimeno-Santos E, de Batlle J, et al. Characterisation and prognosis of undiagnosed chronic obstructive pulmonary disease patients at their first hospitalisation. *BMC Pulm Med.* 2015 17;15:4.
- 66.-Ho TW, Tsai YJ, Ruan SY, et al. In-hospital and one-year mortality and their predictors in patients hospitalized for first-ever chronic obstructive pulmonary disease exacerbations: a nationwide population-based study. *PLoS One.* 2014;9(12):e114866.
- 67.-Groenewegen KH, Schols AM, Wouters EF. Mortality and mortality-related factors after hospitalization for acute exacerbation of COPD. *Chest.* 2003 Aug;124(2):459-67.
- 68.-Gunen H, Hacievliyagil SS, Kosar F, et al. Factors affecting survival of hospitalised patients with COPD. *Eur Respir J.* 2005 ;26(2):234-41.
- 69.-Yohannes AM, Baldwin RC, Connolly MJ. Predictors of 1-year mortality in patients discharged from hospital following acute exacerbation of chronic obstructive pulmonary disease. *Age Ageing.* 2005;34(5):491-6.
- 70.- Gudmundsson G, Ulrik CS, Gislason T, et al. Long-term survival in patients hospitalized for chronic obstructive pulmonary disease: a prospective observational study in the Nordic countries. *Int J Chron Obstruct Pulmon Dis.* 2012;7:571-6.
- 71.-Almagro P, Martinez-Cambolor P, Soriano JB, et al. Finding the best thresholds of FEV1 and dyspnea to predict 5-year survival in COPD patients: the COCOMICS study. *PLoS One.* 2014 ;9(2):e89866.
- 72.- de Torres JP, Casanova C, Marín JM, et al. Prognostic evaluation of COPD patients: GOLD 2011 versus BODE and the COPD comorbidity index COTE. *Thorax.* 2014;69(9):799-804.
- 73.-Celli BR, Cote CG, Marin JM, et al. The body-mass index, airflow obstruction, dyspnea, and exercise capacity index in chronic obstructive pulmonary disease. *N Engl J Med.* 2004;350(10):1005-12.
- 74.- Nishimura K, Izumi T, Tsukino M, Oga T. Dyspnea is a better predictor of 5-year survival than airway obstruction in patients with COPD. *Chest.* 2002;121(5):1434-40.
- 75.-Ström K. Survival of patients with chronic obstructive pulmonary disease receiving long-term domiciliary oxygen therapy. *Am Rev Respir Dis.* 1993 ;147(3):585-91.
- 76.- Prats E, Tejero E, Pardo P, et al. Prognostic Value of the Six-Second Spirometry in Patients with Chronic Obstructive Pulmonary Disease: A Cohort Study. *PLoS One.* 2015 Oct 21;10(10):e0140855.

- 77.- Soriano JB, Lamprecht B, Ramírez AS, et al. Mortality prediction in chronic obstructive pulmonary disease comparing the GOLD 2007 and 2011 staging systems: a pooled analysis of individual patient data. *Lancet Respir Med*. 2015 ;3(6):443-50.
- 78.-Gulbas G, Gunen H, In E, Kilic T. Long-term follow-up of chronic obstructive pulmonary disease patients on long-term oxygen treatment. *Int J Clin Pract*. 2012 ;66(2):152-7.
- 79.-Law S, Boyd S, Macdonald J, Raeside D, Anderson D. Predictors of survival in patients with chronic obstructive pulmonary disease receiving long-term oxygen therapy. *BMJ Support Palliat Care*. 2014 [Epub ahead of print].
- 80.-Costello R, Deegan P, Fitzpatrick M, McNicholas WT. Reversible hypercapnia in chronic obstructive pulmonary disease: a distinct pattern of respiratory failure with a favorable prognosis. *Am J Med*. 1997;102(3):239-44.
- 81.- Aida A, Miyamoto K, Nishimura M, Aiba M, Kira S, Kawakami Y. Prognostic value of hypercapnia in patients with chronic respiratory failure during long-term oxygen therapy. *Am J Respir Crit Care Med*. 1998 ;158(1):188-93.
- 82.-Yang H, Xiang P, Zhang E, et al. Is hypercapnia associated with poor prognosis in chronic obstructive pulmonary disease? A long-term follow-up cohort study. *BMJ Open*. 2015 ;5(12):e008909.
- 83.-Ocal S, Ortac Ersoy E, Ozturk O, Hayran M, Topeli A, Coplu L. Long-term outcome of chronic obstructive pulmonary disease patients with acute respiratory failure following intensive care unit discharge in Turkey. *Clin Respir J*. 2016 [Epub ahead of print].
- 84.-Ai-Ping C, Lee KH, Lim TK. In-hospital and 5-year mortality of patients treated in the ICU for acute exacerbation of COPD: a retrospective study. *Chest*. 2005 ;128(2):518-24.
- 85.-Titlestad IL, Lassen AT, Vestbo J. Long-term survival for COPD patients receiving noninvasive ventilation for acute respiratory failure. *Int J Chron Obstruct Pulmon Dis*. 2013;8:215-9.
- 86.-Breen D, Churches T, Hawker F et al. Acute respiratory failure secondary to chronic obstructive pulmonary disease treated in the intensive care unit: a long term follow up study. *Thorax*. 2002;57:29–33.
- 87.- Plant PK, Owen JL, Elliott MW. Non-invasive ventilation in acute exacerbations of chronic obstructive pulmonary disease: long term survival and predictors of in-hospital outcome. *Thorax*. 2001 ;56(9):708-12.
- 88.-Chu CM, Chan VL, Lin AW, Wong IW, Leung WS, Lai CK. Readmission rates and life threatening events in COPD survivors treated with non-invasive ventilation for acute hypercapnic respiratory failure. *Thorax*. 2004 ;59(12):1020-5.

89.- Marin JM, Alfageme I, Almagro P, et al. Multicomponent indices to predict survival in COPD: the COCOMICS study. *Eur Respir J.* 2013 ;42(2):323-32.

90.-Ko FW, Tam W, Tung AH, et al. A longitudinal study of serial BODE indices in predicting mortality and readmissions for COPD. *Respir Med.* 2011 ;105(2):266-73.

91.-Soler-Cataluña JJ, Martínez-García MA, Sánchez LS, Tordera MP, Sánchez PR. Severe exacerbations and BODE index: two independent risk factors for death in male COPD patients. *Respir Med.* 2009 May;103(5):692-9.
